# Supplementary material
Source: PubMed Central journal article supplement (PMC3553544)
Supplement: NIHMS51180-supplement-01.pdf [file NIHMS51180-supplement-01.pdf]

## **Inventory of supplemental information**

### *Table S1*

Amino acid sequences of all constructs. Related to Figures 2, 3, and 5.

### *Table S2*

$I_{50}$  values calculated from the plots shown in Figures 2, S2, and 3.

### *Figure S1*

SDS-PAGE analysis of constructs with 1-5 glycosylated acceptor sites. Related to Figure 1.

### *Figure S2*

Analysis of Lep<sup>IV</sup> constructs with a 3K/7L/3G H3 segment lacking glycan acceptor site G3. Related to Figure 2.

### *Figure S3*

SDS-PAGE analysis of truncated Lep<sup>V</sup> constructs. Related to Figure 3.

## Supplemental Table S1

In the Lep<sup>V</sup> and Lep<sup>IV</sup> sequences TMH1, TMH2 (in Lep<sup>V</sup>), and the H1-H3 segment underlined and the acceptor sites for N-linked glycosylation are in bold. Positively charged Lys residues flanking H3 were introduced k the Gly residues in the GGPG/GPGG flanks, and in cases with 5 flanking cfl also replacing the two amino acids adjacent to the tetrapeptide flank. Sequences corresponding to gene fragments #1 and #2 (see Experimental Proc are delineated by brackets in the Lep<sup>V</sup> and Lep<sup>IV</sup> sequences.

**Amino acid sequence of Lep<sup>V</sup>** 363 amino acids

MANMFALILVIATLVTGILWCVDKFFFPKRRERQAAAQAAAGDSLKATLKKVAPKPGWLET  
 GASVFPVLAIVLIVRSFIYEPFQIPG [GSMMP**TLNST**DFILVEAFAYGIADPIYQATLIETGH  
 PAPGEVGGPGALAAALAAALAAALAAALAGPGGLEYIAPAVGLPGD**NVTY**DPVSAELTIQPGC  
 SSGQACENGPGGPG**AAAA**L**AAAA**L**AAAA**L**AAAA**AGPGGQLSDFVQTFSPANG**NAT**SGFFEVEPA  
 QETAENGIALSETSGGPGALAAALAAALAAALAAALAGPGGVPGQQQATWIVPAG**NAT**MGDN  
 AD**NST**DSAYWGFVPEANLVGRATAIWMSFDKQEGEWPTGLRLSRIGGIH\*\*PSSFTLSPEL]

**Amino acid sequence of Lep<sup>IV</sup>** 386 amino acids

MAN**ST**SQGSQPINAQAAPVAQGGSGQEFALILVIATLVTGILWCVDKFFFPKRRERQAAAQAA  
 AGDSLKATLKKVAPK [TSGGPGALAAALAAALAAALAAALAGPGGVPIPSGSMMP**TLNST**DFI  
 LVEAFAYGIADPIYQATLIETGHPAPGEVGGPG**AAAA**L**AAAA**L**AAAA**L**AAAA**AGPGGLEYIAPAV  
 GLPGD**NVTY**DPVSAELTIQPGCSSGQACENGPGGPGALAAALAAALAAALAAALAGPGGQLSDF  
 VQTFSPANG**NAT**SGFFEVEPAQETAENGI**RLSERKET**LGDV**THRILT**VP**IAQDQV**GMYYQQPGQ  
 QLATWIVPAG**NAT**MGDN**RDNSAD**SRYWGFVPEANLVGRATAIWMSFDKQEGEWPTGLRLSRIG  
 GIH\*\*PSSFTLSPEL]

**Constructs based on Lep<sup>V</sup>**

| ID | composition of H2           | composition of H3           | series |
|----|-----------------------------|-----------------------------|--------|
| 1  | GGPGAAAAAAAAAAAAAAAAAAGPGG  | GGPGALAAALAAALAAALAAALAGPGG | 1      |
| 2  | GGPGAAAAAAAAALAAAAAAAAAGPGG | GGPGALAAALAAALAAALAAALAGPGG | 1      |
| 3  | GGPGAAAALAAAAAAAAALAAAAGPGG | GGPGALAAALAAALAAALAAALAGPGG | 1      |
| 4  | GGPGAAAALAAAALAAAALAAAAGPGG | GGPGALAAALAAALAAALAAALAGPGG | 1      |
| 5  | GGPGAAAALALAAAALALAAAAGPGG  | GGPGALAAALAAALAAALAAALAGPGG | 1      |
| 6  | GGPGAAAALALAAALALALAAAAGPGG | GGPGALAAALAAALAAALAAALAGPGG | 1      |
| 7  | GGPGAAAALALALALALALAAAAGPGG | GGPGALAAALAAALAAALAAALAGPGG | 1      |
| 8  | GGPGALAAALAAALAAALAAALAGPGG | GGPGALAAALAAALAAALAAALAGPGG | 1      |
| 9  | GGPGAAAAAAAAAAAAAAAAAAGPGG  | KKPKALAAALAAALAAALAAALAGPGG | 2      |
| 10 | GGPGAAAAAAAAALAAAAAAAAAGPGG | KKPKALAAALAAALAAALAAALAGPGG | 2      |
| 11 | GGPGAAAALAAAAAAAAALAAAAGPGG | KKPKALAAALAAALAAALAAALAGPGG | 2      |
| 12 | GGPGAAAALAAAALAAAALAAAAGPGG | KKPKALAAALAAALAAALAAALAGPGG | 2      |
| 13 | GGPGAAAALALAAAALALAAAAGPGG  | KKPKALAAALAAALAAALAAALAGPGG | 2      |

**Supplemental Table S2**

$I_{50}$  values calculated from the plots shown in Figures 2, S2, and 3.

Figure 2 Lep<sup>IV</sup>

| $I_{50}$ | 7L  | 9L  | 11L | 19L |
|----------|-----|-----|-----|-----|
| 5K/nL/3G | 3   |     |     | 2.6 |
| 3K/nL/3G | 3.6 |     |     |     |
| 3G/nL/3G | 3.5 |     |     | 4.6 |
| 3G/nL/3K | 4.8 | 4.5 | 4.4 |     |
| 3G/nL/5K | > 7 |     |     | > 7 |

Figure S2

|          |     |  |  |  |
|----------|-----|--|--|--|
| 3K/nL/3G | 3.6 |  |  |  |
|----------|-----|--|--|--|

Figure 3 Lep<sup>V</sup>

| $I_{50}$ | 0L  | 7L  | 9L  | 11L | 19L        |
|----------|-----|-----|-----|-----|------------|
| 5K/nL/3G |     | 3.5 |     |     | 3.4 (3.0*) |
| 3K/nL/3G |     | 3.3 |     |     |            |
| 3G/nL/3G | 2.9 | 2.8 |     | 2.2 |            |
| 3G/nL/3K |     | 1.2 | 1.3 | 0.6 | < 0        |
| 3G/nL/5K |     | 0.7 |     |     | < 0        |

\*lower Mw form not included in the quantitation, see main text.

**Figure S1, related to Figure 1**

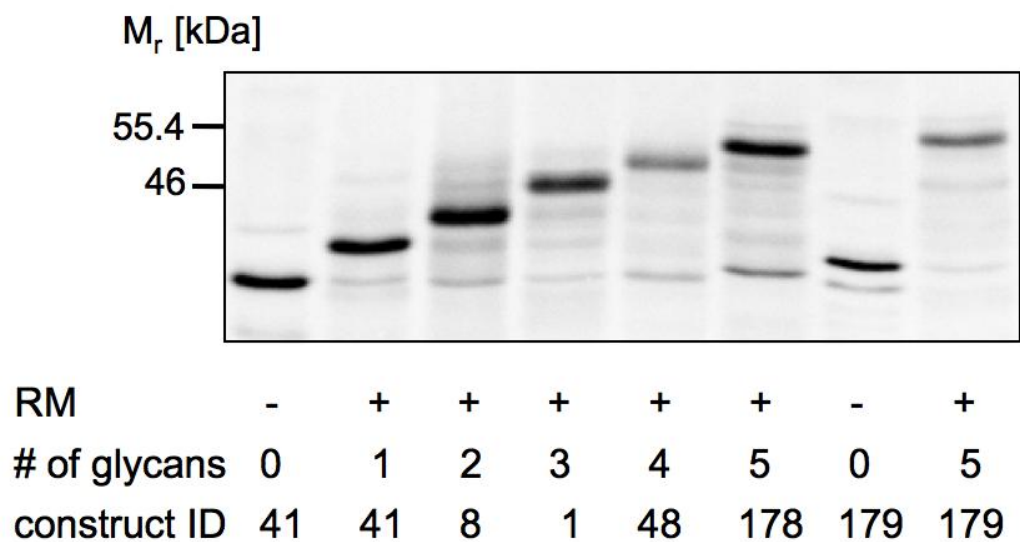

Expression of different constructs (see ID numbers in Table S1 for sequences) glycosylated on zero to five engineered glycosylation acceptor sites. RM = rough microsomes.

Figure S2, related to Figure 2

topology

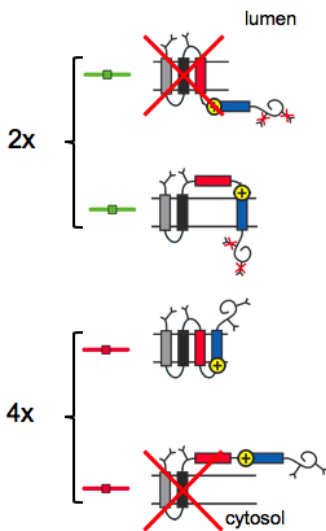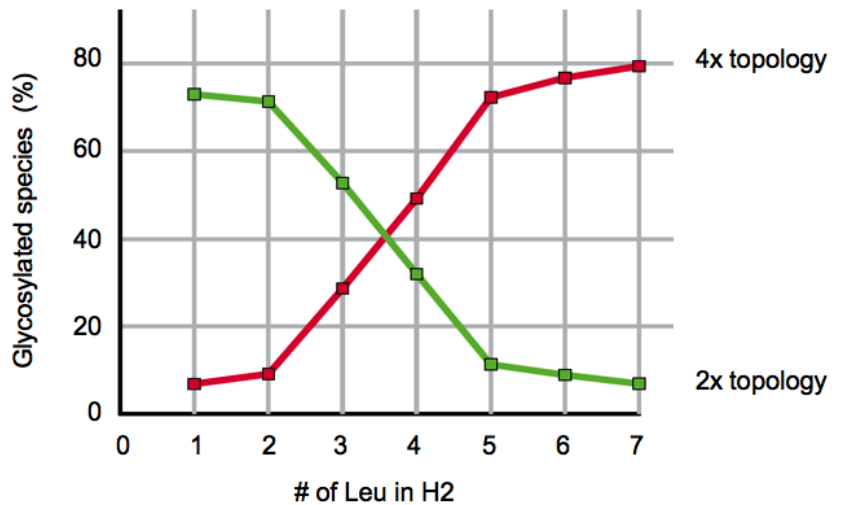

Membrane insertion of Lep<sup>IV</sup> constructs lacking the G3 glycosylation site between H2 and H3 into dog pancreas rough microsomes. The H2 test segments are of varying hydrophobicity ( $n_{H2} = 1-7$ ). H3 has the composition 3K/7L/3G. The graph shows the fractions of the two dominating species with, respectively, two (green) and four (red) glycans. The different topologies consistent with the observed number of glycans are indicated on the left; however, since the H3 segment has a high hydrophobicity, the crossed-out topologies can be ruled out.
